# Supplementary material
Source: publisher figshare collection journal article supplement (https://gsajournals.figshare.com/articles/dataset/_/7414109)
Supplement: Supplementary file 1 [file 1]

## Sheet: Table
Table S2 Light Activation of Yeast-Expressed Rhodopsin Compared to Previous Studies. Yeast measurements represent nine individual colonies. Raw data is represented in arbitrary units (AU) of mCherry fluorescence. Normalized data subtracts the mCherry fluorescence of Vector, and is normalized to wild-type. Normalized values were compared to the published initial transducin activation rate, unless …
Grouped in This Study	Review Class	Residue	Mutant	Dark Raw Data (mCherry AU)	Light Raw Data (mCherry AU)	Normalized Yeast Light Activation	Yeast 95% CI	Published Light Activation	Data Extracted	Reference (See accompanying "Supplemental Figures and Tables for Scott et al., 2018.pdf" for full citations)	Notes	Rhodopsin Gene in Ref.
Control		WT	-	1.51	7.3	1	0.08	1			Raw data for controls is representative of 9 colonies from 3 days. Vector control values from the same day were subtracted from rhodopsin values, then normalized to WT control values from the same day. Thus, normalized values vary slightly vs raw data, as control values vary slightly each day by approx. +/- 0.5 AU
Control		Vector	-	1.37	1.22	0	0.06
Disrupted PTM	4	4	T4K	1.6	3.22	0.4	0.16	0.25		(Opefi et al. 2013)		Bovine
Disrupted PTM	2	15	N15S	1.26	1.99	0.04	0.02	0.09		(Opefi et al. 2013)		Bovine
Disrupted PTM	4	17	T17M	1.36	2.04	0.15	0.05	0.28		(Opefi et al. 2013)		Bovine
Misfolded or Unstable	2	20	V20G	1.61	2.18	0.17	0.02	0.51		(Opefi et al. 2013)		Bovine
Misfolded or Unstable	2	23	P23H	1.31	1.32	0.02	0.06	0.3		(Opefi et al. 2013)		Bovine
Misfolded or Unstable	2	28	Q28H	1.49	2	0.14	0.05	0.23		(Opefi et al. 2013)		Bovine
Misfolded or Unstable	4	39	M39R	1.42	3.36	0.2	0.05	See note		Reported transducin activation >3.4-fold WT for bovine (Ramon et al. 2014) but human mutant is less stable (Davies et al. 2012)
Increased Activation	5	44	M44T	2.83	9.12	1.64	0.61	1.6		(Andres et al. 2003)		Bovine
Disrupted Dimerization	7	45	F45L	2.38	8.37	0.93	0.13	1		(Ploier et al. 2016)	Contained N2C D282C mutations	Bovine
Asymptomatic	A	51	G51A	1.43	6.87	0.95	0.19	0.95		(Bosch et al. 2003)		Bovine
Misfolded or Unstable	4	55	N55K	1.29	1.58	0.06	0.03	0.3		(Ramon et al. 2014)		Bovine
Novel	-	81	V81Δ	1.33	1.4	0.04	0.07
Misfolded or Unstable	2	89	G89D	1.76	2.92	0.34	0.18	0.57		(Bosch et al. 2003)		Bovine
Increased Activation	6	90	G90D	2.12	3.57	0.44	0.09	0.59		(Zvyaga et al. 1996)	Reported constitutive activity in other studies (Rao et al. 1994, Gross et al. 2003)	Bovine
Increased Activation	6	94	T94I	1.42	6.65	1.15	0.46	1.19	Yes	(Gross et al. 2003)		Bovine
Asymptomatic	A	104	V104I	1.78	7.93	1.39	0.26
Misfolded or Unstable	2	106	G106W	1.33	1.91	0.14	0.07			(Andres et al. 2003)	Does not form stable complex with retinal	Bovine
Misfolded or Unstable	2	110	C110Y	1.47	1.69	0.08	0.03			(Hwa et al. 1999)	Does not form stable complex with retinal	Bovine
Misfolded or Unstable	U	114	G114D	1.33	1.56	0.06	0.03			(Andres et al. 2003)	Does not form stable complex with retinal	Bovine
Misfolded or Unstable	2	125	L125R	3.49	3.14	0.42	0.11	0.63	Yes	(Kaushal and Khorana 1994)	May not bind retinal (Garriga et al.1996, Stojanovic et al. 2003)	Bovine
Class 3	3	135	R135G	1.27	1.3	0.01	0.05	0.05		(Min et al. 1993)		Bovine
Increased Activation	5	137	V137M	1.83	7.1	0.76	0.08	1.25		(Andres et al. 2003)		Bovine
arRP	arRP	150	E150K	3.72	7.59	1.32	0.57	1.28		(Zhang et al. 2013)		Mouse
Novel	2	164	A164E	1.53	1.5	0.05	0.06
Novel	2	164	A164V	1.33	1.28	0.01	0.05
Misfolded or Unstable	2	171	P171L	1.4	1.68	0.08	0.03
Increased Activation	U	186	S186W	2.67	6.94	1.2	0.43			(Liu et al. 2013)	Increased dark-state activation	Bovine
Misfolded or Unstable	2	190	D190N	1.52	4.85	0.78	0.29	0.59	Yes	(Sancho-Pelluz et al. 2012)	Mean a-wave ERG measurement from patients	Mouse
Disrupted Dimerization	7	209	V209M	1.8	7.44	0.8	0.05	1		(Ploier et al. 2016)	Contained N2C D282C mutations	Bovine
Disrupted Dimerization	7	220	F220L	2.37	8.42	1.51	0.42				N2C F220C D282C = WT (Ploier et al. 2016)	Bovine
Increased Activation	6	292	A292E	2.09	12.14	2.15	0.52	0.81	Yes	(Gross et al. 2003)	Used transducin activation in response to light	Bovine
Asymptomatic	A	299	A299S	1.71	7.34	0.79	0.04
Disrupted ROS Trafficking	1	328	L328P	2.37	6.18	0.89	0.14	1.1		(Andres et al. 2003)		Bovine
Disrupted ROS Trafficking	1	344	Q344-	1.8	7.13	1.3	0.07	1.12	Yes	(Sung et al. 1994)		Human
Disrupted ROS Trafficking	1	345	V345M	1.86	3.71	0.39	0.08
Disrupted ROS Trafficking	1	347	P347L	1.84	6.89	0.74	0.11

## Sheet: References
Andres, A., P. Garriga, and J. Manyosa. 2003. "Altered functionality in rhodopsin point mutants associated with retinitis pigmentosa." Biochem Biophys Res Commun 303 (1):294-301.
Athanasiou, D., M. Aguila, J. Bellingham, W. Li, C. McCulley, et al. 2018. "The molecular and cellular basis of rhodopsin retinitis pigmentosa reveals potential strategies for therapy." Prog Retin Eye Res 62:1-23. doi: 10.1016/j.preteyeres.2017.10.002.
Bashor, C. J., N. C. Helman, S. Yan, and W. A. Lim. 2008. "Using engineered scaffold interactions to reshape MAP kinase pathway signaling dynamics." Science 319 (5869):1539-43. doi: 10.1126/science.1151153.
Bosch, L., E. Ramon, L. J. Del Valle, and P. Garriga. 2003. "Structural and functional role of helices I and II in rhodopsin. A novel interplay evidenced by mutations at Gly-51 and Gly-89 in the transmembrane domain." J Biol Chem 278 (22):20203-9. doi: 10.1074/jbc.M301319200.
Davies, W. I., S. M. Downes, J. K. Fu, M. E. Shanks, R. R. Copley, et al. 2012. "Next-generation sequencing in health-care delivery: lessons from the functional analysis of rhodopsin." Genet Med 14 (11):891-9. doi: 10.1038/gim.2012.73.
Garriga, P., X. Liu, and H. G. Khorana. 1996. "Structure and function in rhodopsin: correct folding and misfolding in point mutants at and in proximity to the site of the retinitis pigmentosa mutation Leu-125-->Arg in the transmembrane helix C." Proc Natl Acad Sci U S A 93 (10):4560-4.
Gross, A. K., V. R. Rao, and D. D. Oprian. 2003. "Characterization of rhodopsin congenital night blindness mutant T94I." Biochemistry 42 (7):2009-15. doi: 10.1021/bi020613j.
Hwa, J., P. J. Reeves, J. Klein-Seetharaman, F. Davidson, and H. G. Khorana. 1999. "Structure and function in rhodopsin: further elucidation of the role of the intradiscal cysteines, Cys-110, -185, and -187, in rhodopsin folding and function." Proc Natl Acad Sci U S A 96 (5):1932-5.
Jonikas, M. C., S. R. Collins, V. Denic, E. Oh, E. M. Quan, et al. 2009. "Comprehensive characterization of genes required for protein folding in the endoplasmic reticulum." Science 323 (5922):1693-7. doi: 10.1126/science.1167983.
Kaushal, S., and H. G. Khorana. 1994. "Structure and function in rhodopsin. 7. Point mutations associated with autosomal dominant retinitis pigmentosa." Biochemistry 33 (20):6121-8.
Liu, M. Y., J. Liu, D. Mehrotra, Y. Liu, Y. Guo, et al. 2013. "Thermal stability of rhodopsin and progression of retinitis pigmentosa: comparison of S186W and D190N rhodopsin mutants." J Biol Chem 288 (24):17698-712. doi: 10.1074/jbc.M112.397257.
Min, K. C., T. A. Zvyaga, A. M. Cypess, and T. P. Sakmar. 1993. "Characterization of mutant rhodopsins responsible for autosomal dominant retinitis pigmentosa. Mutations on the cytoplasmic surface affect transducin activation." J Biol Chem 268 (13):9400-4.
Opefi, C. A., K. South, C. A. Reynolds, S. O. Smith, and P. J. Reeves. 2013. "Retinitis Pigmentosa Mutants Provide Insight into the Role of the N-terminal Cap in Rhodopsin Folding, Structure, and Function." J Biol Chem 288 (47):33912-26. doi: 10.1074/jbc.M113.483032.
Ploier, B., L. N. Caro, T. Morizumi, K. Pandey, J. N. Pearring, et al. 2016. "Dimerization deficiency of enigmatic retinitis pigmentosa-linked rhodopsin mutants." Nat Commun 7:12832. doi: 10.1038/ncomms12832.
Ramon, E., A. Cordomi, M. Aguila, S. Srinivasan, X. Dong, et al. 2014. "Differential light-induced responses in sectorial inherited retinal degeneration." J Biol Chem 289 (52):35918-28. doi: 10.1074/jbc.M114.609958.
Rohatgi, A. 2017. "WebPlotDigitizer Version 4.0." Last Modified October, 2017. https://automeris.io/WebPlotDigitizer.
Sancho-Pelluz, J., J. Tosi, C. W. Hsu, F. Lee, K. Wolpert, et al. 2012. "Mice with a D190N mutation in the gene encoding rhodopsin: a model for human autosomal-dominant retinitis pigmentosa." Mol Med 18:549-55. doi: 10.2119/molmed.2011.00475.
Stojanovic, A., I. Hwang, H. G. Khorana, and J. Hwa. 2003. "Retinitis pigmentosa rhodopsin mutations L125R and A164V perturb critical interhelical interactions: new insights through compensatory mutations and crystal structure analysis." J Biol Chem 278 (40):39020-8. doi: 10.1074/jbc.M303625200.
Sung, C. H., C. Makino, D. Baylor, and J. Nathans. 1994. "A rhodopsin gene mutation responsible for autosomal dominant retinitis pigmentosa results in a protein that is defective in localization to the photoreceptor outer segment." J Neurosci 14 (10):5818-33.
Zhang, N., A. V. Kolesnikov, B. Jastrzebska, D. Mustafi, O. Sawada, et al. 2013. "Autosomal recessive retinitis pigmentosa E150K opsin mice exhibit photoreceptor disorganization." J Clin Invest 123 (1):121-37. doi: 10.1172/JCI66176.
Zvyaga, T. A., K. Fahmy, F. Siebert, and T. P. Sakmar. 1996. "Characterization of the mutant visual pigment responsible for congenital night blindness: a biochemical and Fourier-transform infrared spectroscopy study." Biochemistry 35 (23):7536-45. doi: 10.1021/bi960391n.
