# Supplementary material
Source: publisher figshare collection journal article supplement (https://gsajournals.figshare.com/articles/dataset/_/7414109)
Supplement: Supplementary file 2 [file 1]

Extracellular

N-Term

# Categories of Human Rhodopsin Mutations Investigated in this Study

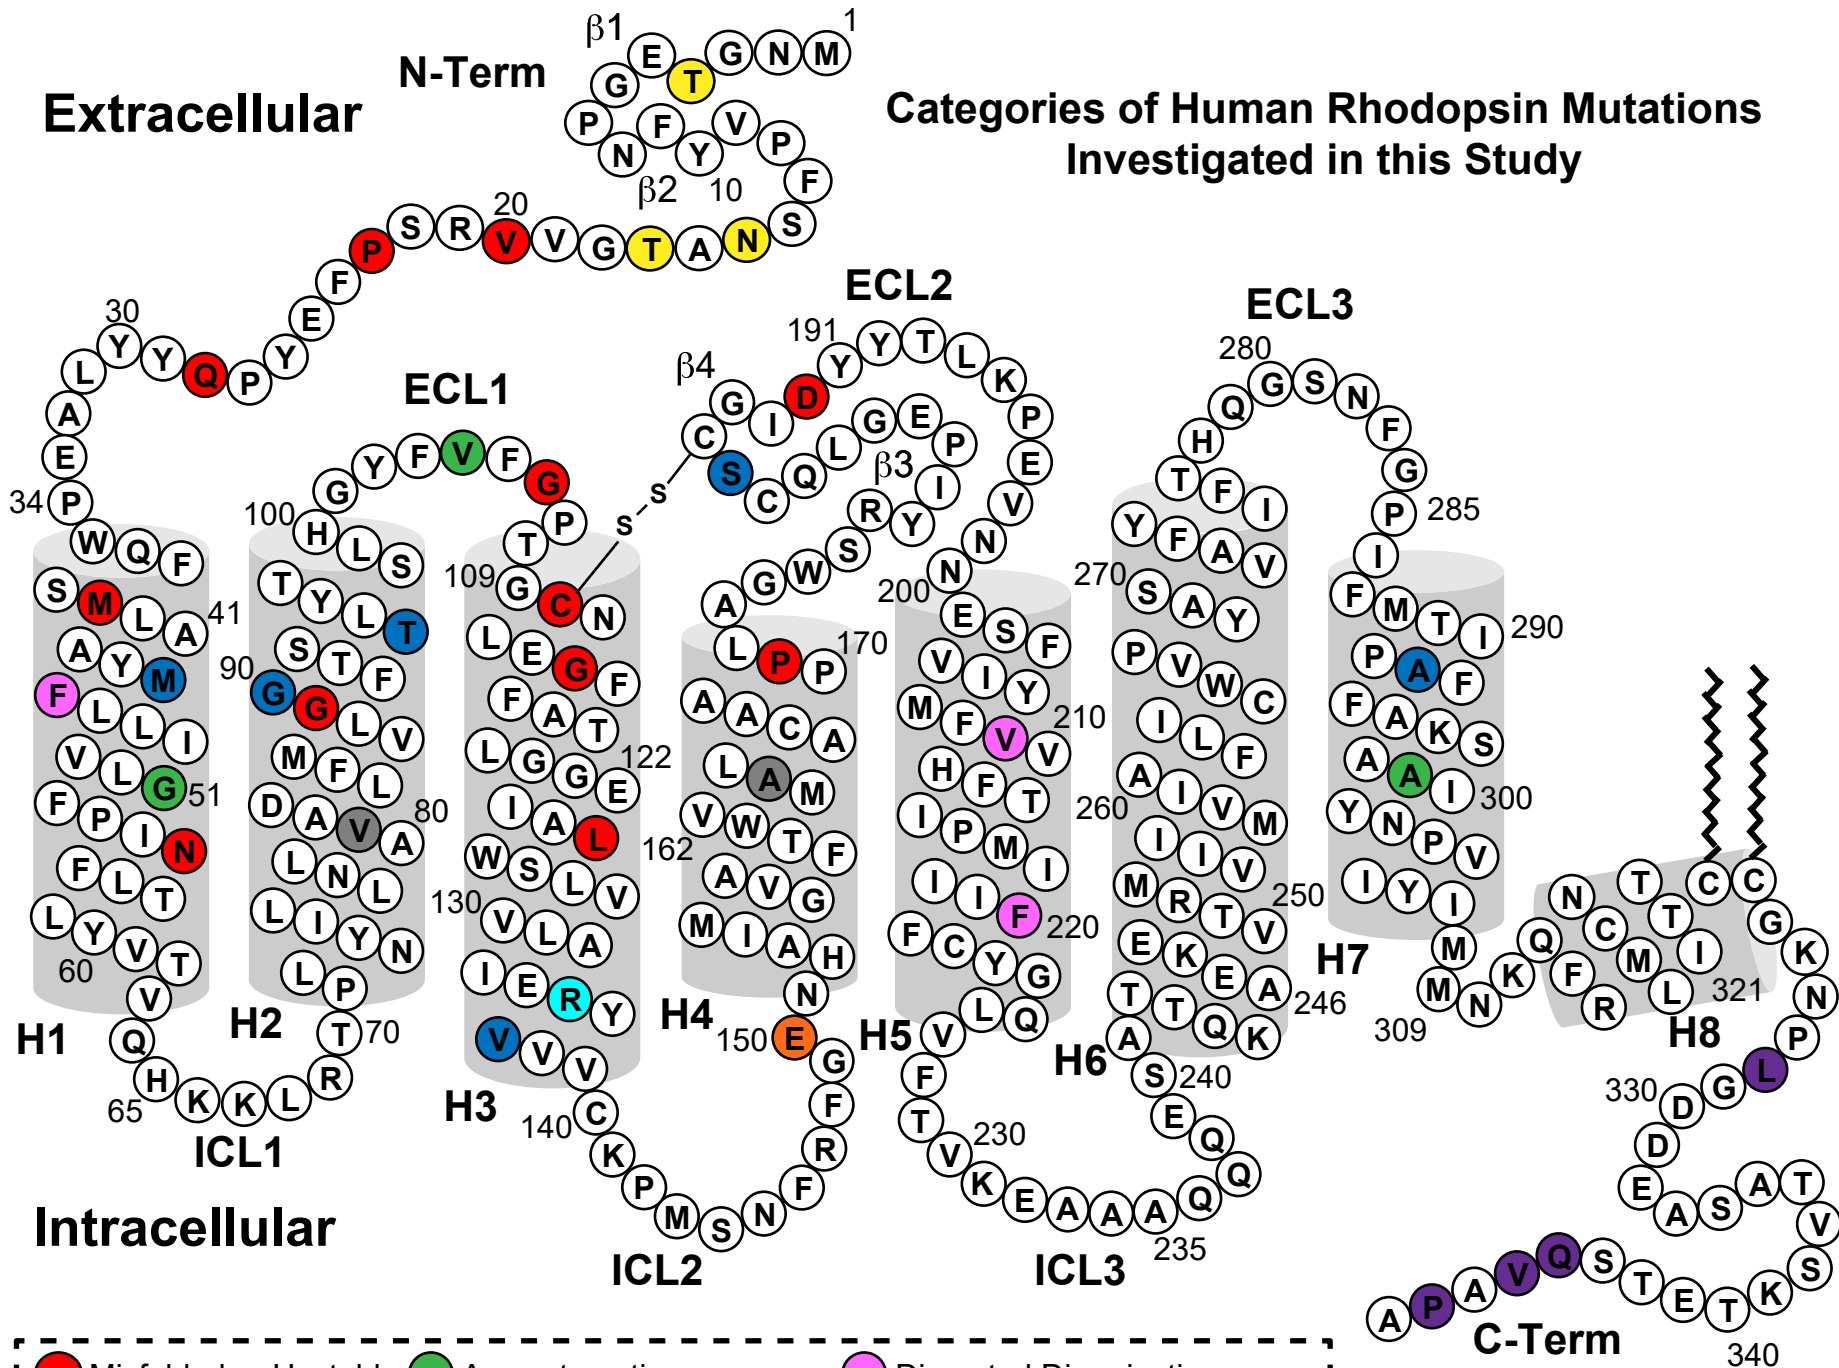

Intracellular

- |                                                          |                                                                 |                                                                    |
|----------------------------------------------------------|-----------------------------------------------------------------|--------------------------------------------------------------------|
| <span style="color: red;">●</span> Misfolded or Unstable | <span style="color: green;">●</span> Asymptomatic               | <span style="color: magenta;">●</span> Disrupted Dimerization      |
| <span style="color: yellow;">●</span> Disrupted PTM      | <span style="color: purple;">●</span> Disrupted ROS Trafficking | <span style="color: orange;">●</span> arRP                         |
| <span style="color: cyan;">●</span> Class 3*             | <span style="color: blue;">●</span> Increased Activation        | <span style="color: gray;">●</span> Novel or Not Studied in Detail |

\*Class 3 denotes mutations at R135, which disrupt G protein coupling and lead to constitutive endocytosis in mammalian cells.
